# Supplementary material for: A distinct RNA recognition mechanism governs Np4 decapping by RppH
Source: PubMed Central journal article supplement — Proc Natl Acad Sci U S A. 2022 Feb 7;119(6):e2117318119. doi: 10.1073/pnas.2117318119 (PMC8833179; doi:10.1073/pnas.2117318119), 2022-02-07
Supplement: pnas.2117318119.sapp.pdf [file pnas.2117318119.sapp.pdf]

# PNAS

## **Supplementary Information for:**

A distinct RNA recognition mechanism governs Np<sub>4</sub> decapping by RppH

Rose Levenson-Palmer, Daniel J. Luciano, Nikita Vasilyev, Ashok Nuthanakanti, Alexander Serganov,  
and Joel G. Belasco

Corresponding author: Joel G. Belasco  
Email: joel.belasco@med.nyu.edu

## **This PDF file includes:**

Figures S1 to S4  
Tables S1 to S3

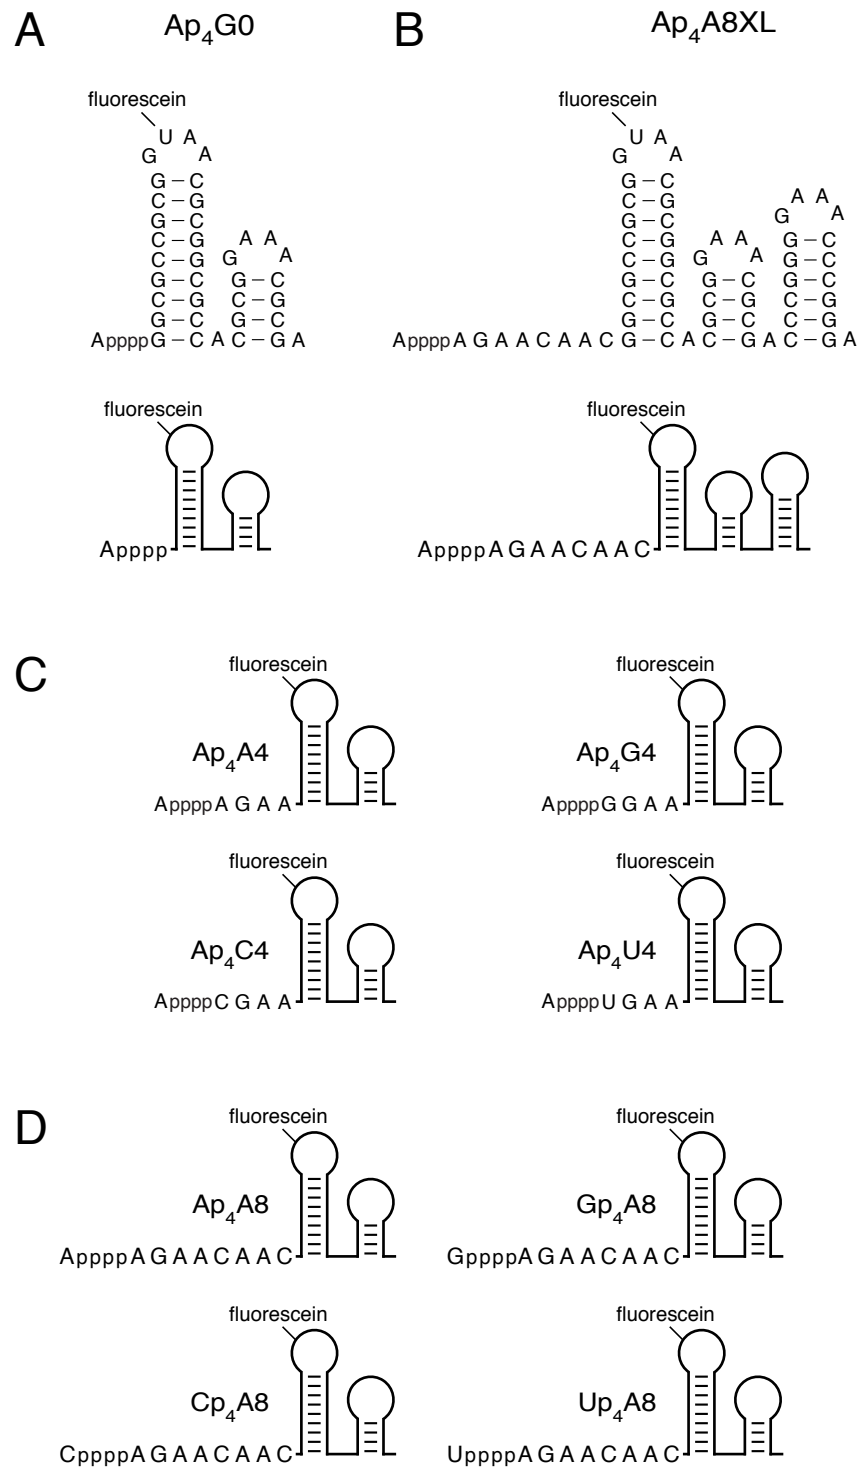

**Figure S1. Sequence and expected secondary structure of substrates used to examine the specificity of decapping by RppH *in vitro*.**

(A)  $Ap_4G_0$ .

(B)  $Ap_4A8XL$ .

(C)  $Ap_4N_4$  RNAs, where N = A, G, C, or U.

(D)  $Np_4A_8$  RNAs, where N = A, G, C, or U.

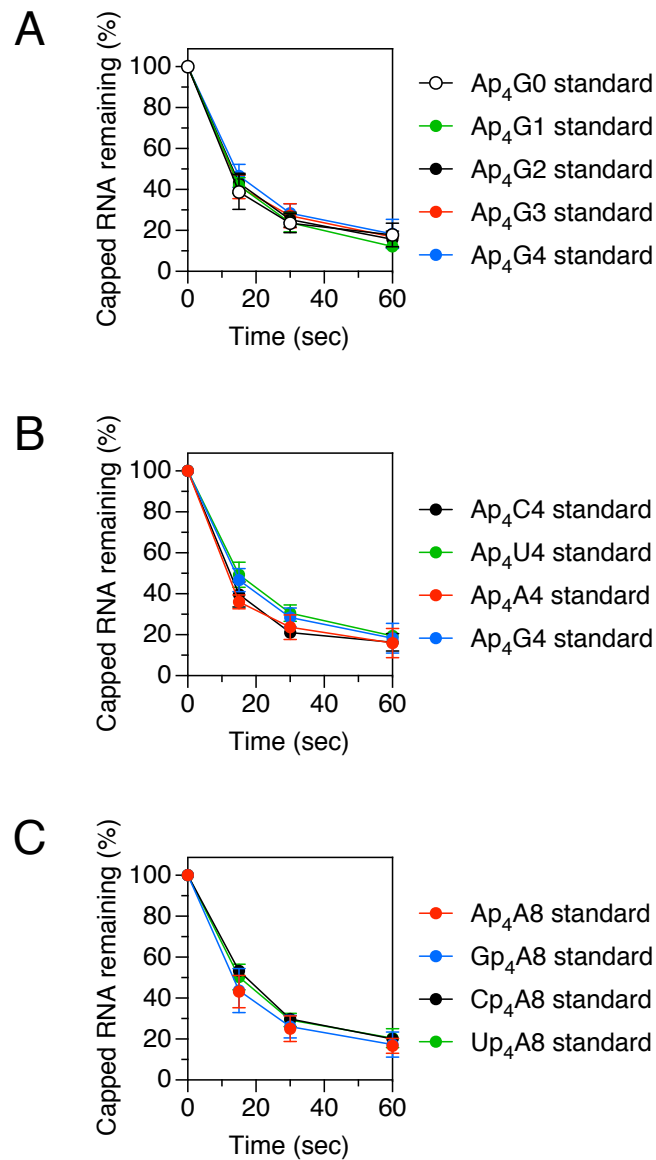

**Figure S2. Decapping of the invariant internal standard Ap<sub>4</sub>A8XL by RppH.**

(A) Decapping of the internal standard in the reactions graphed in Figure 2D.

(B) Decapping of the internal standard in the reactions graphed in Figure 3A.

(C) Decapping of the internal standard in the reactions graphed in Figure 3B.

Ap<sub>4</sub>A8XL was included as an internal standard in each reaction in Figures 2 and 3,

and its decapping by RppH was monitored as in Figure 2. Each time point is the average of three or more independent measurements. Error bars correspond to standard deviations.

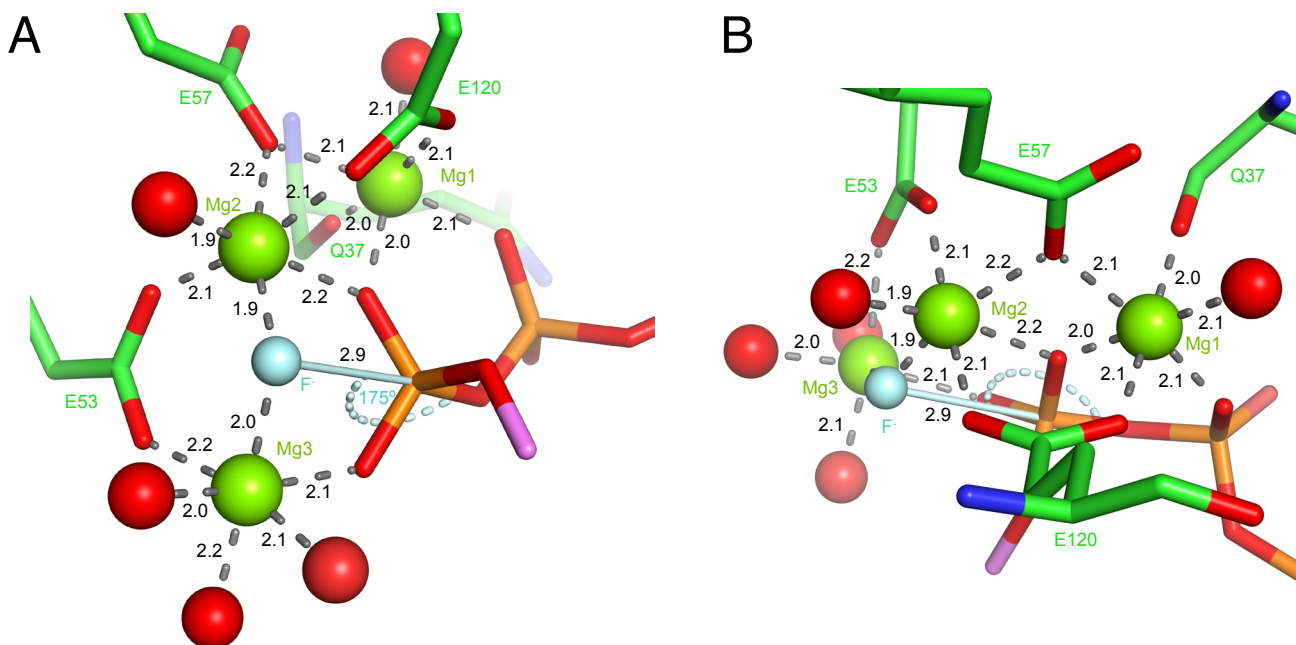

**Figure S3. Detailed views of the RppH catalytic center.**

Zoomed-in side (A) and top (B) views of the catalytic center of RppH bound to  $Ap_4A$ . Green, red, and cyan spheres depict  $Mg^{2+}$  ions, water molecules, and a fluoride ion, respectively. (Note that the spheres are not intended to represent the actual sizes of these ions and molecules.) The cyan stick shows the direction of nucleophilic attack by the fluoride ion on the  $\delta$  phosphate of  $Ap_4A$ , and the curved cyan dashed line shows the angle of in-line attack by this anion on the  $\delta$  phosphorus atom to displace the bridging oxygen atom. The gray dashed lines depict coordination bonds. Coordination distances are indicated in Å. Despite a high concentration of  $Na^+$  ions in the crystallization solution, the large density map peaks in the active site were assigned to three  $Mg^{2+}$  ions and not to  $Na^+$  ions on the basis of their octahedral coordination geometry and coordination distances of 1.9-2.2 Å, which are characteristic of  $Mg^{2+}$  ions.  $Na^+$  ions typically have longer coordination bonds in the range of 2.3-2.4 Å.

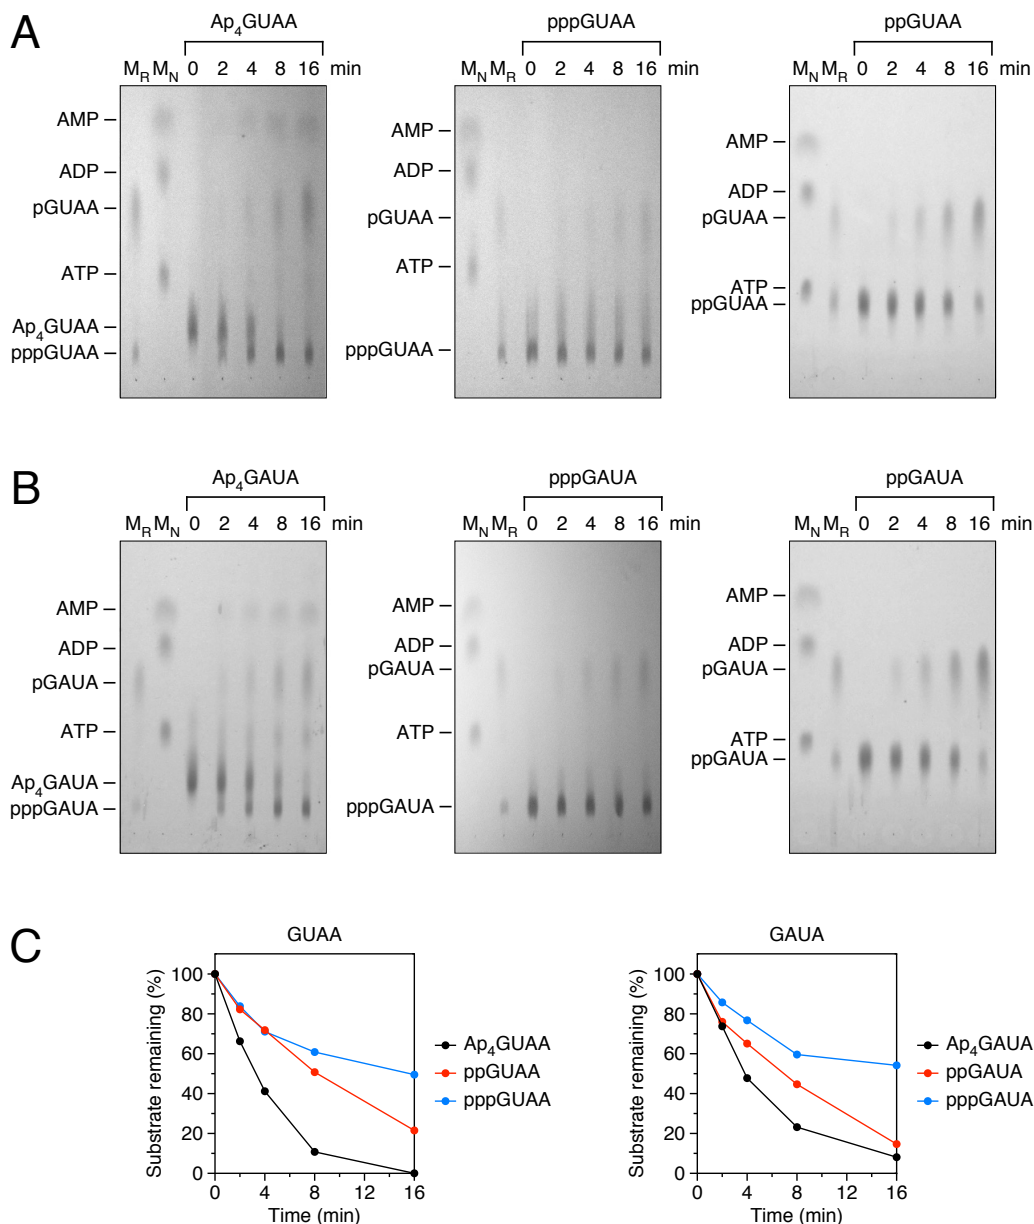

**Figure S4. Comparative reactivity of Ap<sub>4</sub>-capped, triphosphorylated, and diphosphorylated RNA substrates with RppH *in vitro*.**

(A) GUA A. The reaction of Ap<sub>4</sub>GUA A, pppGUA A, and ppGUA A with identical amounts of RppH was monitored as a function of time by thin layer chromatography on fluorescent PEI-cellulose plates and UV shadowing. Mixtures of pGUA A and either pppGUA A or ppGUA A (M<sub>R</sub>) and of ATP, ADP, and AMP (M<sub>N</sub>) were included as markers. Ap<sub>4</sub>GUA A was initially converted primarily to pppGUA A, and both pppGUA A and ppGUA A were converted to pGUA A.

(B) GAUA. The reaction of Ap<sub>4</sub>GAUA, pppGAUA, and ppGAUA with identical amounts of RppH was monitored as a function of time as in panel A, except that pGAUA, ppGAUA, and pppGAUA were substituted as RNA markers (M<sub>R</sub>). Ap<sub>4</sub>GAUA was initially converted primarily to pppGAUA, and both pppGAUA and ppGAUA were converted to pGAUA.

(C) Graphical comparisons of reactivity. The extent of reaction at each time point of the experiments in panels A and B was calculated from the molar ratio of substrate to RNA product(s). Differences in reactivity may have been partially obscured by the high RNA concentration required for detection by UV shadowing, which likely exceeded the  $K_m$  values of these substrates, thereby diminishing the impact of differences in binding affinity.

**Table S1. First-order rate constants measured in *E. coli*.**

| Capped mRNA                      |            | First-order rate constants (min <sup>-1</sup> ) |                    |               |
|----------------------------------|------------|-------------------------------------------------|--------------------|---------------|
|                                  |            | <i>ΔapaH</i>                                    | <i>ΔapaH ΔrppH</i> | Difference    |
|                                  |            |                                                 |                    |               |
| <i>yeiP</i>                      | unstressed | 0.178 ± 0.006                                   | 0.064 ± 0.005      | 0.115 ± 0.008 |
|                                  | stressed   | 0.089 ± 0.004                                   | 0.058 ± 0.003      | 0.031 ± 0.004 |
|                                  |            |                                                 |                    |               |
| <i>efp</i> variants (unstressed) | Wild-type  | 0.108 ± 0.003                                   | 0.074 ± 0.004      | 0.034 ± 0.005 |
|                                  | C1A        | 0.227 ± 0.006                                   | 0.128 ± 0.007      | 0.099 ± 0.009 |
|                                  | C1G        | 0.173 ± 0.011                                   | 0.084 ± 0.004      | 0.089 ± 0.012 |

**Table S2. Data collection and refinement statistics for the RppH-Ap<sub>4</sub>A complex.**

| <b>Dataset</b>                           | <b>RppH-Ap<sub>4</sub>A</b>         |
|------------------------------------------|-------------------------------------|
| <b>Data collection</b>                   |                                     |
| Wavelength                               | 1.54                                |
| Space group                              | C2                                  |
| Unit Cell                                |                                     |
| a, b, c (Å)                              | 79.4, 36.4, 57.8                    |
| α, β, γ (°)                              | 90.0, 102.1, 90.0                   |
| Resolution (Å)                           | 19.40-1.60 (1.66-1.60) <sup>a</sup> |
| R <sub>merge</sub> <sup>b</sup>          | 0.043 (0.587)                       |
| CC <sub>1/2</sub>                        | 1.000 (0.752)                       |
| I/σ(I)                                   | 22.5 (2.6)                          |
| Completeness (%)                         | 97.5 (89.3)                         |
| Redundancy                               | 5.2 (4.4)                           |
| No. of unique reflections                | 20,993 (1,890)                      |
| <b>Refinement</b>                        |                                     |
| Resolution (Å)                           | 18.8-1.6                            |
| R <sub>work</sub> /R <sub>free</sub> (%) | 18.28/21.95                         |
| No. of atoms                             |                                     |
| Protein                                  | 1,301                               |
| Ligand                                   | 37                                  |
| Water                                    | 113                                 |
| Ions                                     | 5                                   |
| Average B factor (Å <sup>2</sup> )       |                                     |
| Protein                                  | 24.8                                |
| Ligand                                   | 40.9                                |
| Water                                    | 32.1                                |
| Ions                                     | 19.7                                |
| R.m.s. deviations                        |                                     |
| Bond lengths (Å)                         | 0.007                               |
| Bond angles (°)                          | 0.957                               |
| Ramachandran analysis                    |                                     |
| Favored (%)                              | 99.3                                |
| Outliers (%)                             | 0                                   |
| Estimated error <sup>c</sup>             | 0.2                                 |

<sup>a</sup> Highest resolution shell (in Å) shown in parentheses.

<sup>b</sup>  $R_{\text{merge}} = \frac{\sum_{hkl} \sum_{i=1}^n |I_i(hkl) - \bar{I}(hkl)|}{\sum_{hkl} \sum_{i=1}^n I_i(hkl)}$ , where  $I_i(hkl)$  is the  $i$ th observation of reflection  $hkl$  and  $\bar{I}(hkl)$  is the weighted average intensity for all  $i$  observations of reflection  $hkl$ .

<sup>c</sup> Estimated coordinate error based on maximum likelihood was calculated by Phenix.refine.

**Table S3. Oligonucleotides used in these studies.**

| Name       | Sequence <sup>a</sup>                                                         | Purpose                                                                                                                |
|------------|-------------------------------------------------------------------------------|------------------------------------------------------------------------------------------------------------------------|
| DZyeiP69   | GTAATTCAGTAGGCTAGCTACAACGACATACCTTTT                                          | 10-23 deoxyribozyme for cleaving <i>yeiP</i> mRNA 69 nucleotides from the 5' end                                       |
| DZefp87    | TCTAACATGAGGCTAGCTACAACGATTTAAGACCA                                           | 10-23 deoxyribozyme for cleaving <i>efp</i> , <i>efp</i> -C1A, and <i>efp</i> -C1G mRNA 87 nucleotides from the 5' end |
| yeiP probe | TTCGTTGCTCTTGGCATCG                                                           | Northern blot probe for <i>yeiP</i> mRNA                                                                               |
| efp probe  | ACGTTGCCATAAGGCCCTCT                                                          | Northern blot probe for <i>efp</i> , <i>efp</i> -C1A, and <i>efp</i> -C1G mRNA                                         |
| A8-5       | AATTCCTGCAGTAATACGACTCACTATTAGAACAACG GCG                                     | Template for Ap <sub>4</sub> A8, Gp <sub>4</sub> A8, Cp <sub>4</sub> A8, Up <sub>4</sub> A8, and Ap <sub>4</sub> A8XL  |
| A8-3       | mUmCGCGTTTCCGCGTGGCGCCGCGTTACCGCGGCG CCGTTGTTCT <sup>b</sup>                  | Template for Ap <sub>4</sub> A8, Gp <sub>4</sub> A8, Cp <sub>4</sub> A8, and Up <sub>4</sub> A8                        |
| A8XL-3     | mUmCCC GGGTTTCCCCGGGTCGCGTTTCCGCGTGGCG CCGCGTTACCGCGGCGCCGTTGTTC <sup>b</sup> | Template for Ap <sub>4</sub> A8XL                                                                                      |
| A4-5       | AATTCCTGCAGTAATACGACTCACTATTAGAAGGCGC                                         | Template for Ap <sub>4</sub> A4                                                                                        |
| A4-3       | mUmCGCGTTTCCGCGTGGCGCCGCGTTACCGCGGCG CCTTCTAATA <sup>b</sup>                  | Template for Ap <sub>4</sub> A4                                                                                        |
| G4-5       | AATTCCTGCAGTAATACGACTCACTATAGGAAGGCGC                                         | Template for Ap <sub>4</sub> G4                                                                                        |
| G4-3       | mUmCGCGTTTCCGCGTGGCGCCGCGTTACCGCGGCG CCTTCCTATA <sup>b</sup>                  | Template for Ap <sub>4</sub> G4                                                                                        |
| C4-5       | AATTCCTGCAGTAATACGACTCACTATACGAAGGCGC                                         | Template for Ap <sub>4</sub> C4                                                                                        |
| C4-3       | mUmCGCGTTTCCGCGTGGCGCCGCGTTACCGCGGCG CCTTCGTATA <sup>b</sup>                  | Template for Ap <sub>4</sub> C4                                                                                        |
| U4-5       | AATTCCTGCAGTAATACGACTCACTATATGAAGGCGC                                         | Template for Ap <sub>4</sub> U4                                                                                        |
| U4-3       | mUmCGCGTTTCCGCGTGGCGCCGCGTTACCGCGGCG CCTTCATATA <sup>b</sup>                  | Template for Ap <sub>4</sub> U4                                                                                        |
| G3-5       | AATTCCTGCAGTAATACGACTCACTATAGGAGGCGC                                          | Template for Ap <sub>4</sub> G3                                                                                        |
| G3-3       | mUmCGCGTTTCCGCGTGGCGCCGCGTTACCGCGGCG CCTCCTATAG <sup>b</sup>                  | Template for Ap <sub>4</sub> G3                                                                                        |
| G2-5       | AATTCCTGCAGTAATACGACTCACTATAGGGGCGC                                           | Template for Ap <sub>4</sub> G2                                                                                        |
| G2-3       | mUmCGCGTTTCCGCGTGGCGCCGCGTTACCGCGGCG CCCCTATAGT <sup>b</sup>                  | Template for Ap <sub>4</sub> G2                                                                                        |
| G1-5       | AATTCCTGCAGTAATACGACTCACTATAGGGGCGC                                           | Template for Ap <sub>4</sub> G1                                                                                        |



|                 |                                                                  |                                                                  |
|-----------------|------------------------------------------------------------------|------------------------------------------------------------------|
| G1-3            | mUmCGCGTTTCCGCGTGGCGCCGCGTTACCGCGGCG<br>CCCTATAGTG <sup>b</sup>  | Template for Ap <sub>4</sub> G1                                  |
| G0-5            | AATTCCTGCAGTAATACGACTCACTATAGGCGC                                | Template for Ap <sub>4</sub> G0                                  |
| G0-3            | mUmCGCGTTTCCGCGTGGCGCCGCGTTACCGCGGCG<br>CCTATAGTGAG <sup>b</sup> | Template for Ap <sub>4</sub> G0                                  |
| GUAA            | GGTTACAATAGTGAGTCGTATTACTG                                       | Template for Ap <sub>4</sub> GUAA,<br>pppGUAA, ppGUAA            |
| GAUA            | GGTATCAATAGTGAGTCGTATTACTG                                       | Template for Ap <sub>4</sub> GAUA,<br>pppGAUA, ppGAUA            |
| P <sub>T7</sub> | CAGTAATACGACTCACTATT                                             | Template for Ap <sub>4</sub> GUAA,<br>Ap <sub>4</sub> GAUA, etc. |

<sup>a</sup> All oligonucleotide sequences are written 5' to 3'.

<sup>b</sup> mU or mC, 2'-O-methyl nucleotide.
